# Supplementary material for: Uncovering the Source of Patrimonial Voting: Evidence from Swedish Twin Pairs
Source: PubMed Central journal article supplement (PMC9674710; doi:10.1007/s11109-020-09669-4), 2021-01-30
Supplement: 11109_2020_9669_MOESM1_ESM.pdf [file 11109_2020_9669_MOESM1_ESM.pdf]

Online appendix for:  
Uncovering the Source of Patrimonial Voting:  
Evidence from Swedish Twin Pairs

Rafael Ahlskog and Anton Brännlund

## Appendix A: robustness checks

### Inverse hyperbolic sine of wealth

As a robustness check to see to what extent the skew in the distribution of wealth affects the results, we here report the same models with the hyperbolic sine of wealth rather than raw wealth. Results from these models are broadly consistent with the main results.

Table A.1:  
Free market preferences

| VARIABLES       | (1)<br>Naive           | (2)<br>Naive           | (3)<br>Naive           | (4)<br>Within      | (5)<br>Within      | (6)<br>Within        |
|-----------------|------------------------|------------------------|------------------------|--------------------|--------------------|----------------------|
| H/S wealth      | 0.0363***<br>(0.00705) | 0.0427***<br>(0.00750) | 0.0460***<br>(0.00755) | 0.0171<br>(0.0202) | 0.0207<br>(0.0220) | 0.0205<br>(0.0257)   |
| $\Delta$ wealth |                        |                        |                        |                    |                    | 0.000230<br>(0.0132) |
| Observations    | 2,222                  | 2,173                  | 2,071                  | 2,173              | 2,071              | 2,071                |
| R-squared       | 0.013                  | 0.031                  | 0.063                  | 0.778              | 0.787              | 0.787                |
| Controls        | No                     | Yes                    | Yes                    | Yes                | Yes                | Yes                  |
| Occupation FE   | No                     | No                     | Yes                    | No                 | Yes                | Yes                  |

Robust standard errors in parentheses  
\*\*\* p<0.01, \*\* p<0.05, \* p<0.1

Table A.2:  
Property tax support

| VARIABLES       | (1)<br>Naive          | (2)<br>Naive          | (3)<br>Naive          | (4)<br>Within        | (5)<br>Within        | (6)<br>Within         |
|-----------------|-----------------------|-----------------------|-----------------------|----------------------|----------------------|-----------------------|
| H/S real wealth | -0.153***<br>(0.0136) | -0.162***<br>(0.0147) | -0.163***<br>(0.0152) | -0.103**<br>(0.0414) | -0.113**<br>(0.0450) | -0.102**<br>(0.0461)  |
| $\Delta$ wealth |                       |                       |                       |                      |                      | -0.00996<br>(0.00717) |
| Observations    | 2,299                 | 2,249                 | 2,143                 | 2,249                | 2,143                | 2,143                 |
| R-squared       | 0.056                 | 0.058                 | 0.076                 | 0.719                | 0.737                | 0.738                 |
| Controls        | No                    | Yes                   | Yes                   | Yes                  | Yes                  | Yes                   |
| Occupation FE   | No                    | No                    | Yes                   | No                   | Yes                  | Yes                   |

Robust standard errors in parentheses  
\*\*\* p<0.01, \*\* p<0.05, \* p<0.1

Table A.3:  
Redistributive preferences

| VARIABLES            | (1)<br>Naive          | (2)<br>Naive          | (3)<br>Naive           | (4)<br>Within       | (5)<br>Within       | (6)<br>Within        |
|----------------------|-----------------------|-----------------------|------------------------|---------------------|---------------------|----------------------|
| H/S financial wealth | -0.123***<br>(0.0163) | -0.109***<br>(0.0170) | -0.0987***<br>(0.0178) | -0.0514<br>(0.0475) | -0.0482<br>(0.0532) | -0.0374<br>(0.0536)  |
| $\Delta$ wealth      |                       |                       |                        |                     |                     | -0.00928<br>(0.0114) |
| Observations         | 2,205                 | 2,159                 | 2,057                  | 2,159               | 2,057               | 2,057                |
| R-squared            | 0.028                 | 0.038                 | 0.064                  | 0.776               | 0.786               | 0.787                |
| Controls             | No                    | Yes                   | Yes                    | Yes                 | Yes                 | Yes                  |
| Occupation FE        | No                    | No                    | Yes                    | No                  | Yes                 | Yes                  |

Robust standard errors in parentheses  
\*\*\* p<0.01, \*\* p<0.05, \* p<0.1

Table A.4:  
Party choice (L-R)

| VARIABLES       | (1)<br>Naive         | (2)<br>Naive         | (3)<br>Naive         | (4)<br>Within       | (5)<br>Within       | (6)<br>Within        |
|-----------------|----------------------|----------------------|----------------------|---------------------|---------------------|----------------------|
| H/S wealth      | 0.179***<br>(0.0124) | 0.157***<br>(0.0134) | 0.154***<br>(0.0141) | 0.0699*<br>(0.0362) | 0.0701*<br>(0.0375) | 0.0692*<br>(0.0393)  |
| $\Delta$ wealth |                      |                      |                      |                     |                     | 0.000863<br>(0.0185) |
| Observations    | 2,101                | 2,054                | 1,964                | 2,054               | 1,964               | 1,964                |
| R-squared       | 0.093                | 0.097                | 0.141                | 0.822               | 0.838               | 0.838                |
| Controls        | No                   | Yes                  | Yes                  | Yes                 | Yes                 | Yes                  |
| Occupation FE   | No                   | No                   | Yes                  | No                  | Yes                 | Yes                  |

Robust standard errors in parentheses  
\*\*\* p<0.01, \*\* p<0.05, \* p<0.1

Table A.5:  
Left-right orientation

| VARIABLES       | (1)<br>Naive          | (2)<br>Naive         | (3)<br>Naive         | (4)<br>Within        | (5)<br>Within       | (6)<br>Within        |
|-----------------|-----------------------|----------------------|----------------------|----------------------|---------------------|----------------------|
| H/S wealth      | 0.134***<br>(0.00985) | 0.125***<br>(0.0107) | 0.122***<br>(0.0110) | 0.0588**<br>(0.0297) | 0.0540*<br>(0.0307) | 0.0715**<br>(0.0347) |
| $\Delta$ wealth |                       |                      |                      |                      |                     | -0.0158<br>(0.0153)  |
| Observations    | 2,303                 | 2,254                | 2,151                | 2,254                | 2,151               | 2,151                |
| R-squared       | 0.074                 | 0.079                | 0.112                | 0.792                | 0.806               | 0.806                |
| Controls        | No                    | Yes                  | Yes                  | Yes                  | Yes                 | Yes                  |
| Occupation FE   | No                    | No                   | Yes                  | No                   | Yes                 | Yes                  |

Robust standard errors in parentheses  
\*\*\* p<0.01, \*\* p<0.05, \* p<0.1

## Contact rate interactions

To address concerns that depression of effect sizes in within-pair models are due to expectations on the part of one twin to take part in the wealth of the other twin and updating preferences on that basis, we report within-pair models where wealth is interacted with the self-reported contact rate between the twins (measured as number of times per year the two are in contact). More specifically, this is accomplished by differencing all variables in the model within pairs, generating difference scores, and interacting these difference scores for the independent variable and all the controls with the contact rate. Note that this generates observations at the pair level rather than individual level - the lower number of observations reported are thus due to each observation representing a pair. The controls are the standard set, without occupation, making the models equivalent to those reported in the fourth column of the main results.

The expectation is that if the above mentioned dynamic does in fact bias our results, a) the coefficients conditional on zero contact should be further away from zero than when this interaction is not included, and b) the interaction coefficients should be significant (table A.6). The results show that the sizes of the wealth coefficients conditional on zero contact are broadly consistent with the uninteracted effect sizes reported in the main text – the exception being for left-right placement, which is *closer* to zero rather than further away from zero. Furthermore, none of the interactions are significant.

Table A.6:

| VARIABLES                         | (1)<br>Free market     | (2)<br>Property tax     | (3)<br>Redistribution    | (4)<br>Left-right      | (5)<br>Party              |
|-----------------------------------|------------------------|-------------------------|--------------------------|------------------------|---------------------------|
| Contact rate                      | 4.45e-05<br>(4.84e-05) | -0.000129<br>(9.66e-05) | -8.49e-05*<br>(4.96e-05) | 6.41e-05<br>(6.98e-05) | 0.000237***<br>(8.93e-05) |
| Wealth                            | 0.00554<br>(0.0114)    |                         |                          | 0.0211<br>(0.0165)     | 0.0516**<br>(0.0201)      |
| Wealth $\times$ Contact           | 8.19e-06<br>(5.90e-05) |                         |                          | 9.57e-05<br>(8.70e-05) | -6.43e-05<br>(0.000105)   |
| Real wealth                       |                        | -0.0601**<br>(0.0269)   |                          |                        |                           |
| Real wealth $\times$ Contact      |                        | -7.61e-07<br>(0.000136) |                          |                        |                           |
| Financial wealth                  |                        |                         | -0.0821**<br>(0.0403)    |                        |                           |
| Financial wealth $\times$ Contact |                        |                         | 0.000258<br>(0.000206)   |                        |                           |
| Observations                      | 827                    | 872                     | 813                      | 878                    | 742                       |
| R-squared                         | 0.017                  | 0.021                   | 0.027                    | 0.029                  | 0.032                     |
| Controls                          | Yes                    | Yes                     | Yes                      | Yes                    | Yes                       |

Standard errors in parentheses  
\*\*\* p<0.01, \*\* p<0.05, \* p<0.1

## Appendix B: full models, main hypotheses

Table B.1:  
Free market preferences

| VARIABLES             | (1)<br>Naive           | (2)<br>Naive             | (3)<br>Naive             | (4)<br>Within         | (5)<br>Within         | (6)<br>Within         |
|-----------------------|------------------------|--------------------------|--------------------------|-----------------------|-----------------------|-----------------------|
| Wealth, MKr           | 0.0228***<br>(0.00424) | 0.0259***<br>(0.00455)   | 0.0276***<br>(0.00453)   | 0.00877<br>(0.0127)   | 0.0104<br>(0.0137)    | 0.00906<br>(0.0158)   |
| Sex of twin           |                        | 0.0401***<br>(0.00898)   | 0.0346***<br>(0.0106)    |                       |                       |                       |
| Work income           |                        | 0.0345<br>(0.0257)       | 0.0532*<br>(0.0291)      | 0.0225<br>(0.0657)    | 0.0289<br>(0.0759)    | 0.0277<br>(0.0765)    |
| Education years       |                        | -0.00751***<br>(0.00176) | -0.00661***<br>(0.00222) | -0.00311<br>(0.00577) | -0.00319<br>(0.00660) | -0.00318<br>(0.00661) |
| Children under 18 = 1 |                        | -0.0175<br>(0.0183)      | -0.0173<br>(0.0193)      | 0.0127<br>(0.0395)    | 0.0185<br>(0.0444)    | 0.0184<br>(0.0444)    |
| Children under 18 = 2 |                        | -0.0108<br>(0.0299)      | -0.0180<br>(0.0299)      | -0.0406<br>(0.0395)   | -0.0387<br>(0.0417)   | -0.0394<br>(0.0420)   |
| Children under 18 = 3 |                        | 0.0185<br>(0.103)        | 0.0325<br>(0.108)        | 0.353***<br>(0.0586)  | 0.388***<br>(0.0845)  | 0.386***<br>(0.0851)  |
| Occupation = 11       |                        |                          | -0.0849<br>(0.129)       |                       | -0.00755<br>(0.171)   | -0.00850<br>(0.170)   |
| Occupation = 12       |                        |                          | -0.0651<br>(0.0405)      |                       | 0.00856<br>(0.0911)   | 0.00854<br>(0.0910)   |
| Occupation = 13       |                        |                          | -0.0578<br>(0.0448)      |                       | 0.0311<br>(0.102)     | 0.0308<br>(0.102)     |
| Occupation = 21       |                        |                          | -0.122***<br>(0.0424)    |                       | -0.0331<br>(0.0974)   | -0.0333<br>(0.0974)   |
| Occupation = 22       |                        |                          | -0.0524<br>(0.0455)      |                       | 0.0132<br>(0.102)     | 0.0129<br>(0.102)     |
| Occupation = 23       |                        |                          | -0.0855**<br>(0.0416)    |                       | 0.00691<br>(0.0930)   | 0.00676<br>(0.0929)   |
| Occupation = 24       |                        |                          | -0.117***<br>(0.0410)    |                       | -0.0116<br>(0.0906)   | -0.0116<br>(0.0905)   |
| Occupation = 31       |                        |                          | -0.119***<br>(0.0411)    |                       | -0.00281<br>(0.0951)  | -0.00288<br>(0.0950)  |
| Occupation = 32       |                        |                          | -0.0911**<br>(0.0432)    |                       | 0.0172<br>(0.0972)    | 0.0168<br>(0.0972)    |
| Occupation = 33       |                        |                          | -0.122***<br>(0.0434)    |                       | -0.00859<br>(0.110)   | -0.00878<br>(0.110)   |
| Occupation = 34       |                        |                          | -0.0899**<br>(0.0398)    |                       | -0.0187<br>(0.0868)   | -0.0189<br>(0.0868)   |
| Occupation = 41       |                        |                          | -0.0703*<br>(0.0403)     |                       | -0.0228<br>(0.0904)   | -0.0231<br>(0.0904)   |
| Occupation = 42       |                        |                          | 0.0231<br>(0.0469)       |                       | 0.0403<br>(0.110)     | 0.0404<br>(0.110)     |
| Occupation = 51       |                        |                          | -0.0768*<br>(0.0395)     |                       | 0.00662<br>(0.0903)   | 0.00663<br>(0.0902)   |
| Occupation = 52       |                        |                          | -0.0418<br>(0.0456)      |                       | 0.0418<br>(0.107)     | 0.0417<br>(0.107)     |
| Occupation = 61       |                        |                          | -0.0334<br>(0.0681)      |                       | 0.0769<br>(0.120)     | 0.0754<br>(0.122)     |
| Occupation = 71       |                        |                          | -0.0967**<br>(0.0435)    |                       | -0.0318<br>(0.0981)   | -0.0316<br>(0.0982)   |
| Occupation = 72       |                        |                          | -0.136***<br>(0.0455)    |                       | -0.0700<br>(0.100)    | -0.0698<br>(0.100)    |
| Occupation = 73       |                        |                          | -0.0749<br>(0.0513)      |                       | 0.00681<br>(0.120)    | 0.00656<br>(0.120)    |
| Occupation = 74       |                        |                          | 0.0645<br>(0.0813)       |                       | 0.0999<br>(0.130)     | 0.100<br>(0.130)      |
| Occupation = 81       |                        |                          | -0.158***<br>(0.0505)    |                       | -0.0596<br>(0.128)    | -0.0605<br>(0.128)    |
| Occupation = 82       |                        |                          | -0.122***<br>(0.0440)    |                       | 0.00563<br>(0.101)    | 0.00530<br>(0.101)    |
| Occupation = 83       |                        |                          | -0.0840*<br>(0.0472)     |                       | -0.0300<br>(0.118)    | -0.0299<br>(0.118)    |
| Occupation = 91       |                        |                          | -0.0814*<br>(0.0430)     |                       | -0.0371<br>(0.0976)   | -0.0369<br>(0.0975)   |
| Occupation = 93       |                        |                          | -0.139**<br>(0.0566)     |                       | -0.0632<br>(0.153)    | -0.0641<br>(0.153)    |
| Sex of twin = o,      |                        |                          |                          | -                     | -                     | -                     |
| $\Delta$ wealth       |                        |                          |                          |                       |                       | 0.00188<br>(0.0132)   |
| Constant              | 0.449***<br>(0.00601)  | 0.500***<br>(0.0207)     | 0.569***<br>(0.0501)     | 0.490***<br>(0.0687)  | 0.491***<br>(0.123)   | 0.492***<br>(0.123)   |
| Observations          | 2,222                  | 2,173                    | 2,071                    | 2,173                 | 2,071                 | 2,071                 |
| R-squared             | 0.014                  | 0.031                    | 0.062                    | 0.778                 | 0.786                 | 0.786                 |

Robust standard errors in parentheses  
\*\*\* p<0.01, \*\* p<0.05, \* p<0.1

Table B.2:  
Property tax support

| VARIABLES             | (1)<br>Naive           | (2)<br>Naive          | (3)<br>Naive           | (4)<br>Within         | (5)<br>Within         | (6)<br>Within        |
|-----------------------|------------------------|-----------------------|------------------------|-----------------------|-----------------------|----------------------|
| Real wealth, MKr      | -0.102***<br>(0.00965) | -0.107***<br>(0.0104) | -0.108***<br>(0.0108)  | -0.0617**<br>(0.0306) | -0.0682**<br>(0.0330) | -0.0596*<br>(0.0339) |
| Sex of twin           |                        | 0.00348<br>(0.0152)   | 0.0136<br>(0.0190)     |                       |                       |                      |
| Work income           |                        | 0.00757<br>(0.0430)   | 0.0144<br>(0.0494)     | -0.00561<br>(0.129)   | 0.0216<br>(0.146)     | 0.0362<br>(0.147)    |
| Education years       |                        | 0.00484*<br>(0.00286) | 0.00875**<br>(0.00376) | 0.0142<br>(0.00997)   | 0.0172<br>(0.0123)    | 0.0168<br>(0.0123)   |
| Children under 18 = 1 |                        | -0.0202<br>(0.0320)   | -0.0112<br>(0.0328)    | -0.0174<br>(0.0688)   | -0.0196<br>(0.0767)   | -0.0118<br>(0.0775)  |
| Children under 18 = 2 |                        | -0.0514<br>(0.0447)   | -0.0668<br>(0.0432)    | -0.00343<br>(0.124)   | -0.00517<br>(0.122)   | -0.00191<br>(0.122)  |
| Children under 18 = 3 |                        | 0.141<br>(0.153)      | 0.144<br>(0.143)       | 0.0244<br>(0.0548)    | -0.00658<br>(0.130)   | -0.00139<br>(0.130)  |
| Occupation = 11       |                        |                       | 0.394**<br>(0.194)     |                       | 0.176<br>(0.426)      | 0.175<br>(0.427)     |
| Occupation = 12       |                        |                       | 0.187*<br>(0.0980)     |                       | 0.154<br>(0.219)      | 0.152<br>(0.221)     |
| Occupation = 13       |                        |                       | 0.111<br>(0.102)       |                       | -0.0778<br>(0.246)    | -0.0999<br>(0.247)   |
| Occupation = 21       |                        |                       | 0.168*<br>(0.1000)     |                       | 0.0845<br>(0.223)     | 0.0844<br>(0.225)    |
| Occupation = 22       |                        |                       | 0.0875<br>(0.100)      |                       | -0.00834<br>(0.233)   | -0.00633<br>(0.235)  |
| Occupation = 23       |                        |                       | 0.197**<br>(0.0973)    |                       | 0.0823<br>(0.220)     | 0.0819<br>(0.222)    |
| Occupation = 24       |                        |                       | 0.156<br>(0.0969)      |                       | 0.0260<br>(0.218)     | 0.0235<br>(0.220)    |
| Occupation = 31       |                        |                       | 0.195**<br>(0.0988)    |                       | 0.228<br>(0.223)      | 0.230<br>(0.225)     |
| Occupation = 32       |                        |                       | 0.132<br>(0.0988)      |                       | 0.00129<br>(0.225)    | 0.00192<br>(0.226)   |
| Occupation = 33       |                        |                       | 0.177*<br>(0.101)      |                       | 0.126<br>(0.229)      | 0.128<br>(0.231)     |
| Occupation = 34       |                        |                       | 0.159*<br>(0.0954)     |                       | 0.0533<br>(0.216)     | 0.0530<br>(0.218)    |
| Occupation = 41       |                        |                       | 0.166*<br>(0.0964)     |                       | 0.0660<br>(0.219)     | 0.0666<br>(0.221)    |
| Occupation = 42       |                        |                       | 0.235**<br>(0.110)     |                       | 0.0996<br>(0.248)     | 0.0998<br>(0.250)    |
| Occupation = 51       |                        |                       | 0.184*<br>(0.0960)     |                       | 0.0634<br>(0.217)     | 0.0629<br>(0.219)    |
| Occupation = 52       |                        |                       | 0.175*<br>(0.105)      |                       | 0.103<br>(0.234)      | 0.116<br>(0.237)     |
| Occupation = 61       |                        |                       | 0.252*<br>(0.133)      |                       | 0.200<br>(0.354)      | 0.204<br>(0.353)     |
| Occupation = 71       |                        |                       | 0.267***<br>(0.0994)   |                       | 0.170<br>(0.227)      | 0.169<br>(0.229)     |
| Occupation = 72       |                        |                       | 0.175*<br>(0.103)      |                       | 0.0703<br>(0.242)     | 0.0683<br>(0.244)    |
| Occupation = 73       |                        |                       | 0.269**<br>(0.134)     |                       | -0.0171<br>(0.299)    | -0.0151<br>(0.299)   |
| Occupation = 74       |                        |                       | -0.131<br>(0.133)      |                       | 0.0559<br>(0.438)     | 0.0537<br>(0.443)    |
| Occupation = 81       |                        |                       | 0.190<br>(0.121)       |                       | 0.0385<br>(0.338)     | 0.0388<br>(0.338)    |
| Occupation = 82       |                        |                       | 0.239**<br>(0.102)     |                       | 0.110<br>(0.237)      | 0.111<br>(0.238)     |
| Occupation = 83       |                        |                       | 0.218**<br>(0.104)     |                       | 0.0529<br>(0.272)     | 0.0523<br>(0.274)    |
| Occupation = 91       |                        |                       | 0.187*<br>(0.101)      |                       | 0.0674<br>(0.236)     | 0.0652<br>(0.237)    |
| Occupation = 93       |                        |                       | 0.162<br>(0.133)       |                       | -0.00305<br>(0.310)   | -0.00150<br>(0.308)  |
| Sex of twin = 0,      |                        |                       |                        | -                     | -                     | -                    |
| Δ wealth              |                        |                       |                        |                       |                       | -0.0111<br>(0.00751) |
| Constant              | 0.468***<br>(0.00977)  | 0.410***<br>(0.0340)  | 0.177<br>(0.109)       | 0.272**<br>(0.124)    | 0.154<br>(0.274)      | 0.155<br>(0.276)     |
| Observations          | 2,299                  | 2,249                 | 2,143                  | 2,249                 | 2,143                 | 2,143                |
| R-squared             | 0.050                  | 0.052                 | 0.069                  | 0.717                 | 0.736                 | 0.736                |

Robust standard errors in parentheses  
\*\*\* p<0.01, \*\* p<0.05, \* p<0.1



Table B.3:  
Redistributive preferences

| VARIABLES             | (1)<br>Naive          | (2)<br>Naive           | (3)<br>Naive           | (4)<br>Within         | (5)<br>Within         | (6)<br>Within         |
|-----------------------|-----------------------|------------------------|------------------------|-----------------------|-----------------------|-----------------------|
| Financial wealth, MKr | -0.106***<br>(0.0147) | -0.0936***<br>(0.0154) | -0.0844***<br>(0.0161) | -0.0398<br>(0.0413)   | -0.0365<br>(0.0463)   | -0.0271<br>(0.0466)   |
| Sex of twin           |                       | 0.0126<br>(0.00903)    | 0.00794<br>(0.0112)    |                       |                       |                       |
| Work income           |                       | -0.0801***<br>(0.0270) | -0.0801**<br>(0.0315)  | -0.0338<br>(0.0682)   | -0.0267<br>(0.0787)   | -0.0242<br>(0.0794)   |
| Education years       |                       | -0.000664<br>(0.00173) | -0.00210<br>(0.00219)  | -0.00534<br>(0.00586) | -0.00627<br>(0.00655) | -0.00611<br>(0.00662) |
| Children under 18 = 1 |                       | 0.0395*<br>(0.0210)    | 0.0417*<br>(0.0217)    | 0.0264<br>(0.0376)    | 0.0144<br>(0.0397)    | 0.0174<br>(0.0395)    |
| Children under 18 = 2 |                       | 0.00842<br>(0.0315)    | 0.0220<br>(0.0310)     | 0.0650<br>(0.0488)    | 0.0715<br>(0.0513)    | 0.0759<br>(0.0520)    |
| Children under 18 = 3 |                       | 0.00316<br>(0.0842)    | -0.0176<br>(0.0844)    | -0.250***<br>(0.0445) | -0.266***<br>(0.0626) | -0.263***<br>(0.0633) |
| Occupation = 11       |                       |                        | 0.245<br>(0.163)       |                       | 0.252<br>(0.184)      | 0.258<br>(0.184)      |
| Occupation = 12       |                       |                        | 0.0946*<br>(0.0548)    |                       | 0.0116<br>(0.125)     | 0.0162<br>(0.125)     |
| Occupation = 13       |                       |                        | 0.0834<br>(0.0579)     |                       | -0.0326<br>(0.135)    | -0.0202<br>(0.137)    |
| Occupation = 21       |                       |                        | 0.115**<br>(0.0563)    |                       | 0.0476<br>(0.132)     | 0.0509<br>(0.133)     |
| Occupation = 22       |                       |                        | 0.117**<br>(0.0573)    |                       | 0.0606<br>(0.129)     | 0.0622<br>(0.129)     |
| Occupation = 23       |                       |                        | 0.129**<br>(0.0549)    |                       | 0.0549<br>(0.129)     | 0.0588<br>(0.129)     |
| Occupation = 24       |                       |                        | 0.134**<br>(0.0549)    |                       | 0.0378<br>(0.125)     | 0.0405<br>(0.126)     |
| Occupation = 31       |                       |                        | 0.117**<br>(0.0542)    |                       | 0.0674<br>(0.129)     | 0.0727<br>(0.130)     |
| Occupation = 32       |                       |                        | 0.160***<br>(0.0555)   |                       | 0.0853<br>(0.128)     | 0.0875<br>(0.128)     |
| Occupation = 33       |                       |                        | 0.163***<br>(0.0562)   |                       | 0.0797<br>(0.135)     | 0.0836<br>(0.135)     |
| Occupation = 34       |                       |                        | 0.107**<br>(0.0533)    |                       | 0.0567<br>(0.121)     | 0.0615<br>(0.122)     |
| Occupation = 41       |                       |                        | 0.0989*<br>(0.0539)    |                       | 0.0571<br>(0.124)     | 0.0627<br>(0.125)     |
| Occupation = 42       |                       |                        | 0.0495<br>(0.0581)     |                       | 0.0890<br>(0.142)     | 0.0902<br>(0.142)     |
| Occupation = 51       |                       |                        | 0.143***<br>(0.0534)   |                       | 0.0524<br>(0.125)     | 0.0560<br>(0.125)     |
| Occupation = 52       |                       |                        | 0.0915<br>(0.0596)     |                       | 0.0320<br>(0.137)     | 0.0354<br>(0.137)     |
| Occupation = 61       |                       |                        | 0.0570<br>(0.0678)     |                       | -0.0690<br>(0.170)    | -0.0442<br>(0.169)    |
| Occupation = 71       |                       |                        | 0.132**<br>(0.0562)    |                       | 0.0464<br>(0.129)     | 0.0493<br>(0.130)     |
| Occupation = 72       |                       |                        | 0.171***<br>(0.0562)   |                       | 0.0801<br>(0.141)     | 0.0842<br>(0.142)     |
| Occupation = 73       |                       |                        | 0.101<br>(0.0654)      |                       | -0.0384<br>(0.189)    | -0.0328<br>(0.190)    |
| Occupation = 74       |                       |                        | 0.0615<br>(0.0965)     |                       | -0.0415<br>(0.143)    | -0.0465<br>(0.146)    |
| Occupation = 81       |                       |                        | 0.174***<br>(0.0665)   |                       | 0.0569<br>(0.153)     | 0.0646<br>(0.153)     |
| Occupation = 82       |                       |                        | 0.144**<br>(0.0567)    |                       | 0.0330<br>(0.130)     | 0.0389<br>(0.130)     |
| Occupation = 83       |                       |                        | 0.145**<br>(0.0583)    |                       | 0.0439<br>(0.141)     | 0.0485<br>(0.142)     |
| Occupation = 91       |                       |                        | 0.123**<br>(0.0568)    |                       | 0.0543<br>(0.130)     | 0.0564<br>(0.131)     |
| Occupation = 93       |                       |                        | 0.120**<br>(0.0588)    |                       | 0.00512<br>(0.156)    | 0.0143<br>(0.156)     |
| Sex of twin = o,      |                       |                        |                        | -                     | -                     | -                     |
| $\Delta$ wealth       |                       |                        |                        |                       |                       | -0.00955<br>(0.0114)  |
| Constant              | 0.616***<br>(0.00513) | 0.643***<br>(0.0205)   | 0.540***<br>(0.0612)   | 0.680***<br>(0.0711)  | 0.641***<br>(0.150)   | 0.639***<br>(0.151)   |
| Observations          | 2,205                 | 2,159                  | 2,057                  | 2,159                 | 2,057                 | 2,057                 |
| R-squared             | 0.026                 | 0.037                  | 0.063                  | 0.776                 | 0.786                 | 0.787                 |

Robust standard errors in parentheses  
\*\*\* p<0.01, \*\* p<0.05, \* p<0.1

Table B.4:

| VARIABLES             | Party choice (L-R)    |                        |                        |                       |                      |                      |
|-----------------------|-----------------------|------------------------|------------------------|-----------------------|----------------------|----------------------|
|                       | (1)<br>Naive          | (2)<br>Naive           | (3)<br>Naive           | (4)<br>Within         | (5)<br>Within        | (6)<br>Within        |
| Wealth, MKr           | 0.107***<br>(0.00735) | 0.0934***<br>(0.00798) | 0.0913***<br>(0.00848) | 0.0476**<br>(0.0219)  | 0.0442*<br>(0.0226)  | 0.0439*<br>(0.0234)  |
| Sex of twin           |                       | 0.0150<br>(0.0168)     | 0.00290<br>(0.0201)    |                       |                      |                      |
| Work income           |                       | 0.142***<br>(0.0461)   | 0.104**<br>(0.0527)    | -0.000554<br>(0.116)  | 0.0637<br>(0.133)    | 0.0634<br>(0.134)    |
| Education years       |                       | 0.00639**<br>(0.00322) | 0.00224<br>(0.00409)   | -0.00953<br>(0.00982) | -0.00722<br>(0.0112) | -0.00722<br>(0.0112) |
| Children under 18 = 1 |                       | -0.0781**<br>(0.0321)  | -0.0754**<br>(0.0329)  | -0.0578<br>(0.0739)   | -0.0437<br>(0.0806)  | -0.0437<br>(0.0806)  |
| Children under 18 = 2 |                       | -0.00118<br>(0.0530)   | -0.0351<br>(0.0509)    | -0.0407<br>(0.0639)   | -0.0288<br>(0.0789)  | -0.0290<br>(0.0794)  |
| Children under 18 = 3 |                       | 0.179<br>(0.116)       | 0.221*<br>(0.116)      | 0.348***<br>(0.0877)  | 0.395*<br>(0.234)    | 0.394*<br>(0.235)    |
| Occupation = 11       |                       |                        | -0.565***<br>(0.194)   |                       | -0.325<br>(0.291)    | -0.325<br>(0.291)    |
| Occupation = 12       |                       |                        | -0.342***<br>(0.0456)  |                       | -0.424*<br>(0.245)   | -0.424*<br>(0.245)   |
| Occupation = 13       |                       |                        | -0.298***<br>(0.0658)  |                       | -0.287<br>(0.254)    | -0.287<br>(0.254)    |
| Occupation = 21       |                       |                        | -0.369***<br>(0.0513)  |                       | -0.379<br>(0.246)    | -0.379<br>(0.246)    |
| Occupation = 22       |                       |                        | -0.313***<br>(0.0542)  |                       | -0.492**<br>(0.250)  | -0.492*<br>(0.251)   |
| Occupation = 23       |                       |                        | -0.362***<br>(0.0463)  |                       | -0.470*<br>(0.244)   | -0.470*<br>(0.244)   |
| Occupation = 24       |                       |                        | -0.354***<br>(0.0459)  |                       | -0.421*<br>(0.238)   | -0.421*<br>(0.238)   |
| Occupation = 31       |                       |                        | -0.390***<br>(0.0500)  |                       | -0.396<br>(0.244)    | -0.396<br>(0.244)    |
| Occupation = 32       |                       |                        | -0.424***<br>(0.0490)  |                       | -0.530**<br>(0.245)  | -0.530**<br>(0.245)  |
| Occupation = 33       |                       |                        | -0.420***<br>(0.0543)  |                       | -0.453*<br>(0.246)   | -0.453*<br>(0.246)   |
| Occupation = 34       |                       |                        | -0.334***<br>(0.0447)  |                       | -0.429*<br>(0.236)   | -0.429*<br>(0.236)   |
| Occupation = 41       |                       |                        | -0.325***<br>(0.0464)  |                       | -0.423*<br>(0.241)   | -0.423*<br>(0.241)   |
| Occupation = 42       |                       |                        | -0.214***<br>(0.0632)  |                       | -0.430<br>(0.265)    | -0.430<br>(0.265)    |
| Occupation = 51       |                       |                        | -0.420***<br>(0.0441)  |                       | -0.443*<br>(0.238)   | -0.443*<br>(0.239)   |
| Occupation = 52       |                       |                        | -0.324***<br>(0.0606)  |                       | -0.334<br>(0.257)    | -0.334<br>(0.257)    |
| Occupation = 61       |                       |                        | -0.335***<br>(0.0835)  |                       | -0.218<br>(0.323)    | -0.219<br>(0.324)    |
| Occupation = 71       |                       |                        | -0.466***<br>(0.0508)  |                       | -0.469*<br>(0.242)   | -0.469*<br>(0.242)   |
| Occupation = 72       |                       |                        | -0.521***<br>(0.0602)  |                       | -0.501**<br>(0.255)  | -0.501**<br>(0.255)  |
| Occupation = 73       |                       |                        | -0.212**<br>(0.103)    |                       | -0.312<br>(0.248)    | -0.312<br>(0.249)    |
| Occupation = 74       |                       |                        | -0.184<br>(0.181)      |                       | -0.433<br>(0.280)    | -0.433<br>(0.281)    |
| Occupation = 81       |                       |                        | -0.507***<br>(0.0867)  |                       | -0.637**<br>(0.320)  | -0.637**<br>(0.320)  |
| Occupation = 82       |                       |                        | -0.468***<br>(0.0537)  |                       | -0.479*<br>(0.252)   | -0.479*<br>(0.252)   |
| Occupation = 83       |                       |                        | -0.466***<br>(0.0583)  |                       | -0.478*<br>(0.253)   | -0.478*<br>(0.254)   |
| Occupation = 91       |                       |                        | -0.445***<br>(0.0538)  |                       | -0.348<br>(0.248)    | -0.348<br>(0.248)    |
| Occupation = 93       |                       |                        | -0.558***<br>(0.0754)  |                       | -0.654**<br>(0.325)  | -0.655**<br>(0.325)  |
| Sex of twin = o,      |                       |                        |                        | -                     | -                    | -                    |
| Δ wealth              |                       |                        |                        |                       |                      | 0.000543<br>(0.0185) |
| Constant              | 0.350***<br>(0.0109)  | 0.227***<br>(0.0365)   | 0.680***<br>(0.0698)   | 0.520***<br>(0.119)   | 0.905***<br>(0.272)  | 0.905***<br>(0.272)  |
| Observations          | 2,101                 | 2,054                  | 1,964                  | 2,054                 | 1,964                | 1,964                |
| R-squared             | 0.089                 | 0.094                  | 0.138                  | 0.822                 | 0.838                | 0.838                |

Robust standard errors in parentheses

\*\*\* p&lt;0.01, \*\* p&lt;0.05, \* p&lt;0.1

Table B.5:  
Left-right orientation

| VARIABLES             | (1)<br>Naive           | (2)<br>Naive           | (3)<br>Naive           | (4)<br>Within         | (5)<br>Within         | (6)<br>Within         |
|-----------------------|------------------------|------------------------|------------------------|-----------------------|-----------------------|-----------------------|
| Wealth, MKr           | 0.0811***<br>(0.00578) | 0.0764***<br>(0.00633) | 0.0740***<br>(0.00652) | 0.0362**<br>(0.0180)  | 0.0319*<br>(0.0183)   | 0.0424**<br>(0.0206)  |
| Sex of twin           |                        | 0.0373***<br>(0.0134)  | 0.0280*<br>(0.0154)    |                       |                       |                       |
| Work income           |                        | 0.137***<br>(0.0370)   | 0.106**<br>(0.0424)    | 0.0992<br>(0.0879)    | 0.0822<br>(0.0994)    | 0.0921<br>(0.0989)    |
| Education years       |                        | -0.00151<br>(0.00260)  | -0.00482<br>(0.00335)  | -0.00531<br>(0.00799) | -0.00621<br>(0.00923) | -0.00636<br>(0.00917) |
| Children under 18 = 1 |                        | -0.0370<br>(0.0251)    | -0.0333<br>(0.0262)    | -0.0116<br>(0.0584)   | -0.00879<br>(0.0615)  | -0.00708<br>(0.0615)  |
| Children under 18 = 2 |                        | 0.0351<br>(0.0392)     | 0.0202<br>(0.0401)     | 0.00677<br>(0.0764)   | 0.00965<br>(0.0883)   | 0.0156<br>(0.0886)    |
| Children under 18 = 3 |                        | 0.106<br>(0.128)       | 0.149<br>(0.138)       | 0.350***<br>(0.122)   | 0.383***<br>(0.131)   | 0.392***<br>(0.133)   |
| Occupation = 11       |                        |                        | -0.511***<br>(0.0873)  |                       | -0.389*<br>(0.212)    | -0.381*<br>(0.210)    |
| Occupation = 12       |                        |                        | -0.288***<br>(0.0483)  |                       | -0.264<br>(0.185)     | -0.264<br>(0.185)     |
| Occupation = 13       |                        |                        | -0.234***<br>(0.0570)  |                       | -0.161<br>(0.200)     | -0.159<br>(0.202)     |
| Occupation = 21       |                        |                        | -0.332***<br>(0.0547)  |                       | -0.362*<br>(0.195)    | -0.361*<br>(0.196)    |
| Occupation = 22       |                        |                        | -0.261***<br>(0.0541)  |                       | -0.367*<br>(0.189)    | -0.364*<br>(0.190)    |
| Occupation = 23       |                        |                        | -0.294***<br>(0.0495)  |                       | -0.329*<br>(0.190)    | -0.327*<br>(0.191)    |
| Occupation = 24       |                        |                        | -0.286***<br>(0.0492)  |                       | -0.298<br>(0.182)     | -0.299<br>(0.183)     |
| Occupation = 31       |                        |                        | -0.307***<br>(0.0513)  |                       | -0.298<br>(0.191)     | -0.297<br>(0.192)     |
| Occupation = 32       |                        |                        | -0.335***<br>(0.0505)  |                       | -0.344*<br>(0.189)    | -0.342*<br>(0.190)    |
| Occupation = 33       |                        |                        | -0.340***<br>(0.0555)  |                       | -0.382**<br>(0.191)   | -0.380**<br>(0.192)   |
| Occupation = 34       |                        |                        | -0.275***<br>(0.0476)  |                       | -0.308*<br>(0.182)    | -0.307*<br>(0.183)    |
| Occupation = 41       |                        |                        | -0.263***<br>(0.0489)  |                       | -0.307*<br>(0.186)    | -0.307<br>(0.187)     |
| Occupation = 42       |                        |                        | -0.238***<br>(0.0578)  |                       | -0.329<br>(0.215)     | -0.330<br>(0.216)     |
| Occupation = 51       |                        |                        | -0.326***<br>(0.0481)  |                       | -0.340*<br>(0.186)    | -0.340*<br>(0.187)    |
| Occupation = 52       |                        |                        | -0.284***<br>(0.0617)  |                       | -0.325<br>(0.206)     | -0.324<br>(0.207)     |
| Occupation = 61       |                        |                        | -0.239***<br>(0.0684)  |                       | -0.0794<br>(0.284)    | -0.0678<br>(0.284)    |
| Occupation = 71       |                        |                        | -0.366***<br>(0.0562)  |                       | -0.364*<br>(0.192)    | -0.366*<br>(0.192)    |
| Occupation = 72       |                        |                        | -0.416***<br>(0.0582)  |                       | -0.469**<br>(0.212)   | -0.471**<br>(0.213)   |
| Occupation = 73       |                        |                        | -0.204**<br>(0.0840)   |                       | -0.246<br>(0.215)     | -0.245<br>(0.215)     |
| Occupation = 74       |                        |                        | -0.274*<br>(0.157)     |                       | -0.304<br>(0.213)     | -0.308<br>(0.213)     |
| Occupation = 81       |                        |                        | -0.387***<br>(0.0727)  |                       | -0.314<br>(0.204)     | -0.308<br>(0.206)     |
| Occupation = 82       |                        |                        | -0.422***<br>(0.0527)  |                       | -0.377*<br>(0.198)    | -0.375*<br>(0.198)    |
| Occupation = 83       |                        |                        | -0.367***<br>(0.0557)  |                       | -0.327<br>(0.218)     | -0.328<br>(0.219)     |
| Occupation = 91       |                        |                        | -0.371***<br>(0.0548)  |                       | -0.321*<br>(0.190)    | -0.323*<br>(0.190)    |
| Occupation = 93       |                        |                        | -0.428***<br>(0.0954)  |                       | -0.507*<br>(0.288)    | -0.501*<br>(0.291)    |
| Sex of twin = o,      |                        |                        |                        | -                     | -                     | -                     |
| Δ wealth              |                        |                        |                        |                       |                       | -0.0148<br>(0.0154)   |
| Constant              | 0.422***<br>(0.00885)  | 0.374***<br>(0.0305)   | 0.743***<br>(0.0665)   | 0.491***<br>(0.0944)  | 0.837***<br>(0.217)   | 0.835***<br>(0.218)   |
| Observations          | 2,303                  | 2,254                  | 2,151                  | 2,254                 | 2,151                 | 2,151                 |
| R-squared             | 0.074                  | 0.079                  | 0.111                  | 0.791                 | 0.805                 | 0.806                 |

Robust standard errors in parentheses  
\*\*\* p<0.01, \*\* p<0.05, \* p<0.1

Table B.6:  
VIF-scores, model 5

| Outcome         | Free mkt. | Leftright | Party | Redist. | Prop. tax |
|-----------------|-----------|-----------|-------|---------|-----------|
| Wealth          | 1.17      | 1.16      | 1.17  |         |           |
| Fin. wealth     |           |           |       | 1.06    |           |
| Real wealth     |           |           |       |         | 1.13      |
| Income          | 1.57      | 1.55      | 1.58  | 1.54    | 1.54      |
| Education       | 2.12      | 2.13      | 2.14  | 2.09    | 2.11      |
| Children = 1    | 1.02      | 1.02      | 1.03  | 1.02    | 1.02      |
| Children = 2    | 1.02      | 1.03      | 1.03  | 1.03    | 1.02      |
| Children = 3    | 1.01      | 1.01      | 1.01  | 1.01    | 1.01      |
| Occupation = 11 | 1.31      | 1.31      | 1.39  | 1.34    | 1.31      |
| Occupation = 12 | 11.00     | 11.47     | 13.47 | 12.23   | 11.37     |
| Occupation = 13 | 4.60      | 4.61      | 5.01  | 5.11    | 4.99      |
| Occupation = 21 | 8.45      | 8.54      | 9.81  | 8.85    | 8.61      |
| Occupation = 22 | 6.73      | 6.83      | 7.81  | 7.05    | 6.73      |
| Occupation = 23 | 13.53     | 14.00     | 16.08 | 15.11   | 13.99     |
| Occupation = 24 | 14.55     | 15.02     | 18.08 | 16.16   | 15.00     |
| Occupation = 31 | 11.16     | 11.63     | 12.95 | 11.79   | 11.52     |
| Occupation = 32 | 8.89      | 9.55      | 10.84 | 9.57    | 9.08      |
| Occupation = 33 | 6.38      | 7.24      | 8.30  | 7.29    | 6.95      |
| Occupation = 34 | 21.27     | 21.92     | 25.11 | 23.31   | 21.89     |
| Occupation = 41 | 18.54     | 19.26     | 21.12 | 20.71   | 18.91     |
| Occupation = 42 | 4.85      | 4.85      | 5.40  | 5.27    | 4.85      |
| Occupation = 51 | 29.23     | 30.57     | 34.38 | 32.42   | 30.60     |
| Occupation = 52 | 6.76      | 6.77      | 7.66  | 7.17    | 6.76      |
| Occupation = 61 | 3.23      | 3.33      | 3.75  | 3.88    | 2.88      |
| Occupation = 71 | 10.55     | 10.94     | 12.36 | 11.16   | 10.84     |
| Occupation = 72 | 6.79      | 6.79      | 6.83  | 7.09    | 6.88      |
| Occupation = 73 | 1.82      | 1.82      | 2.02  | 1.80    | 1.82      |
| Occupation = 74 | 1.73      | 1.83      | 1.77  | 1.57    | 1.83      |
| Occupation = 81 | 2.43      | 2.43      | 2.65  | 2.59    | 2.33      |
| Occupation = 82 | 8.19      | 8.40      | 9.67  | 9.07    | 8.78      |
| Occupation = 83 | 7.37      | 7.66      | 7.80  | 8.17    | 7.76      |
| Occupation = 91 | 9.37      | 9.38      | 9.78  | 9.73    | 9.48      |
| Occupation = 93 | 2.26      | 2.26      | 2.44  | 2.51    | 2.26      |

## 1 Appendix C: additional test of H1

Table C.1:  
Free market preferences

| VARIABLES             | (1)<br>Naive         | (2)<br>Naive             | (3)<br>Naive            | (4)<br>Within         | (5)<br>Within         | (6)<br>Within         |
|-----------------------|----------------------|--------------------------|-------------------------|-----------------------|-----------------------|-----------------------|
| Financial wealth, MKr | 0.0351**<br>(0.0152) | 0.0397**<br>(0.0157)     | 0.0393**<br>(0.0162)    | 0.0101<br>(0.0381)    | 0.00878<br>(0.0435)   | 0.00553<br>(0.0439)   |
| Sex of twin           |                      | 0.0386***<br>(0.00910)   | 0.0364***<br>(0.0109)   |                       |                       |                       |
| Work income           |                      | 0.0580**<br>(0.0258)     | 0.0813***<br>(0.0299)   | 0.0235<br>(0.0666)    | 0.0293<br>(0.0767)    | 0.0282<br>(0.0766)    |
| Education years       |                      | -0.00598***<br>(0.00177) | -0.00537**<br>(0.00222) | -0.00174<br>(0.00613) | -0.00297<br>(0.00683) | -0.00305<br>(0.00685) |
| Children under 18 = 1 |                      | -0.0182<br>(0.0185)      | -0.0164<br>(0.0195)     | 0.0208<br>(0.0393)    | 0.0289<br>(0.0440)    | 0.0280<br>(0.0440)    |
| Children under 18 = 2 |                      | -0.0117<br>(0.0299)      | -0.0180<br>(0.0300)     | -0.0496<br>(0.0414)   | -0.0550<br>(0.0445)   | -0.0571<br>(0.0452)   |
| Children under 18 = 3 |                      | 0.0389<br>(0.112)        | 0.0572<br>(0.118)       | 0.354***<br>(0.0586)  | 0.388***<br>(0.0889)  | 0.387***<br>(0.0896)  |
| Occupation = 11       |                      |                          | -0.0776<br>(0.130)      |                       | -0.107<br>(0.124)     | -0.109<br>(0.124)     |
| Occupation = 12       |                      |                          | -0.0552<br>(0.0419)     |                       | 0.00937<br>(0.0904)   | 0.00821<br>(0.0905)   |
| Occupation = 13       |                      |                          | -0.0366<br>(0.0464)     |                       | 0.0301<br>(0.100)     | 0.0260<br>(0.101)     |
| Occupation = 21       |                      |                          | -0.102**<br>(0.0437)    |                       | -0.0352<br>(0.0990)   | -0.0358<br>(0.0992)   |
| Occupation = 22       |                      |                          | -0.0475<br>(0.0466)     |                       | 0.0145<br>(0.102)     | 0.0140<br>(0.102)     |
| Occupation = 23       |                      |                          | -0.0790*<br>(0.0425)    |                       | 0.0124<br>(0.0928)    | 0.0116<br>(0.0929)    |
| Occupation = 24       |                      |                          | -0.108**<br>(0.0422)    |                       | -0.00499<br>(0.0906)  | -0.00552<br>(0.0906)  |
| Occupation = 31       |                      |                          | -0.108**<br>(0.0424)    |                       | -0.00269<br>(0.0954)  | -0.00393<br>(0.0954)  |
| Occupation = 32       |                      |                          | -0.0836*<br>(0.0444)    |                       | 0.0214<br>(0.0965)    | 0.0200<br>(0.0967)    |
| Occupation = 33       |                      |                          | -0.111**<br>(0.0444)    |                       | -0.00123<br>(0.109)   | -0.00253<br>(0.110)   |
| Occupation = 34       |                      |                          | -0.0786*<br>(0.0410)    |                       | -0.0170<br>(0.0865)   | -0.0185<br>(0.0868)   |
| Occupation = 41       |                      |                          | -0.0624<br>(0.0414)     |                       | -0.0167<br>(0.0902)   | -0.0183<br>(0.0905)   |
| Occupation = 42       |                      |                          | 0.0289<br>(0.0481)      |                       | 0.0439<br>(0.111)     | 0.0440<br>(0.111)     |
| Occupation = 51       |                      |                          | -0.0711*<br>(0.0406)    |                       | 0.0161<br>(0.0904)    | 0.0151<br>(0.0905)    |
| Occupation = 52       |                      |                          | -0.0377<br>(0.0471)     |                       | 0.0450<br>(0.108)     | 0.0443<br>(0.108)     |
| Occupation = 61       |                      |                          | -0.00167<br>(0.0630)    |                       | 0.0852<br>(0.120)     | 0.0802<br>(0.121)     |
| Occupation = 71       |                      |                          | -0.0897**<br>(0.0444)   |                       | -0.0293<br>(0.0978)   | -0.0295<br>(0.0980)   |
| Occupation = 72       |                      |                          | -0.126***<br>(0.0464)   |                       | -0.0675<br>(0.101)    | -0.0677<br>(0.101)    |
| Occupation = 73       |                      |                          | -0.0669<br>(0.0517)     |                       | 0.0155<br>(0.121)     | 0.0140<br>(0.121)     |
| Occupation = 74       |                      |                          | 0.0636<br>(0.0818)      |                       | 0.0924<br>(0.127)     | 0.0947<br>(0.128)     |
| Occupation = 81       |                      |                          | -0.157***<br>(0.0523)   |                       | -0.0662<br>(0.129)    | -0.0679<br>(0.129)    |
| Occupation = 82       |                      |                          | -0.113**<br>(0.0451)    |                       | 0.00940<br>(0.101)    | 0.00757<br>(0.102)    |
| Occupation = 83       |                      |                          | -0.0765<br>(0.0481)     |                       | -0.0245<br>(0.118)    | -0.0256<br>(0.118)    |
| Occupation = 91       |                      |                          | -0.0767*<br>(0.0440)    |                       | -0.0328<br>(0.0976)   | -0.0330<br>(0.0977)   |
| Occupation = 93       |                      |                          | -0.114**<br>(0.0555)    |                       | -0.106<br>(0.146)     | -0.109<br>(0.146)     |
| Sex of twin = o,      |                      |                          |                         | -                     | -                     | -                     |
| Δ wealth              |                      |                          |                         |                       |                       | 0.00387<br>(0.00879)  |
| Observations          | 2,218                | 2,170                    | 2,068                   | 2,170                 | 2,068                 | 2,068                 |
| R-squared             | 0.003                | 0.018                    | 0.049                   | 0.777                 | 0.787                 | 0.788                 |
| Controls              | No                   | Yes                      | Yes                     | Yes                   | Yes                   | Yes                   |
| Occupation FE         | No                   | No                       | Yes                     | No                    | Yes                   | Yes                   |

Robust standard errors in parentheses  
\*\*\* p<0.01, \*\* p<0.05, \* p<0.1

## Appendix D: additional outcomes

These are results for outcomes constructed from the first five principal components of the preference data, as previously identified by Oskarsson et al. (2014). The dimensions contain the following questions (level of agreement coded according to sign):

### Dimension 1

- Decrease the public sector (+)
- Lower taxes (+)
- Privatize public enterprises (+)
- Privatize healthcare (+)
- Support free schools (+)
- Give companies more freedom (+)

### Dimension 2

- Increase economic support to rural areas (+)
- Introduce 6-hour work day for all employees (+)

### Dimension 3

- Introduce much harder punishment for criminals (+)
- Increase labor immigration to Sweden (-)
- Introduce a language test to become a Swedish citizen (+)
- Decrease foreign aid (+)
- Accept fewer refugees (+)
- Increase economic support for immigrant culture (-)

#### Dimension 4

- Invest more in preventing environmental degradation (+)
- Decrease carbon dioxide emissions (+)

#### Dimension 5

- Sweden should leave the EU (+)
- Sweden should introduce the euro (-)
- Sweden should become a member of NATO (-)

Table D.1:  
Dimension 1

| VARIABLES     | (1)<br>Naive           | (2)<br>Naive           | (3)<br>Within       |
|---------------|------------------------|------------------------|---------------------|
| Wealth, MKr   | 0.0309***<br>(0.00483) | 0.0287***<br>(0.00525) | 0.00854<br>(0.0156) |
| Observations  | 2,201                  | 2,052                  | 2,052               |
| R-squared     | 0.021                  | 0.055                  | 0.791               |
| Controls      | No                     | Yes                    | Yes                 |
| Occupation FE | No                     | Yes                    | Yes                 |

Robust standard errors in parentheses

\*\*\* p<0.01, \*\* p<0.05, \* p<0.1

Table D.2:  
Dimension 2

| VARIABLES     | (1)<br>Naive            | (2)<br>Naive            | (3)<br>Within        |
|---------------|-------------------------|-------------------------|----------------------|
| Wealth, MKr   | -0.0730***<br>(0.00616) | -0.0466***<br>(0.00641) | -0.0281*<br>(0.0163) |
| Observations  | 2,298                   | 2,142                   | 2,142                |
| R-squared     | 0.081                   | 0.148                   | 0.820                |
| Controls      | No                      | Yes                     | Yes                  |
| Occupation FE | No                      | Yes                     | Yes                  |

Robust standard errors in parentheses

\*\*\* p<0.01, \*\* p<0.05, \* p<0.1



Table D.3:  
Dimension 3

| VARIABLES     | (1)<br>Naive            | (2)<br>Naive         | (3)<br>Within        |
|---------------|-------------------------|----------------------|----------------------|
| Wealth, MKr   | -0.0145***<br>(0.00508) | 0.00758<br>(0.00517) | -0.00429<br>(0.0132) |
| Observations  | 2,255                   | 2,107                | 2,107                |
| R-squared     | 0.004                   | 0.173                | 0.858                |
| Controls      | No                      | Yes                  | Yes                  |
| Occupation FE | No                      | Yes                  | Yes                  |

Robust standard errors in parentheses  
\*\*\* p<0.01, \*\* p<0.05, \* p<0.1

Table D.4:  
Dimension 4

| VARIABLES     | (1)<br>Naive           | (2)<br>Naive          | (3)<br>Within       |
|---------------|------------------------|-----------------------|---------------------|
| Wealth, MKr   | -0.00828*<br>(0.00425) | -0.00619<br>(0.00459) | -0.0197<br>(0.0157) |
| Observations  | 2,293                  | 2,139                 | 2,139               |
| R-squared     | 0.002                  | 0.039                 | 0.748               |
| Controls      | No                     | Yes                   | Yes                 |
| Occupation FE | No                     | Yes                   | Yes                 |

Robust standard errors in parentheses  
\*\*\* p<0.01, \*\* p<0.05, \* p<0.1

Table D.5:  
Dimension 5

| VARIABLES     | (1)<br>Naive            | (2)<br>Naive            | (3)<br>Within       |
|---------------|-------------------------|-------------------------|---------------------|
| Wealth, MKr   | -0.0556***<br>(0.00587) | -0.0321***<br>(0.00656) | -0.0201<br>(0.0192) |
| Observations  | 2,256                   | 2,103                   | 2,103               |
| R-squared     | 0.042                   | 0.092                   | 0.802               |
| Controls      | No                      | Yes                     | Yes                 |
| Occupation FE | No                      | Yes                     | Yes                 |

Robust standard errors in parentheses  
\*\*\* p<0.01, \*\* p<0.05, \* p<0.1

## Appendix E: population comparison

Table E.1 contains a comparison on some key variables where we have data both for the twin sample and the general population. The twins are slightly more educated and have higher incomes, but the differences are fairly negligible. The twin sample also contains a larger proportion of women than would be expected by random chance.

Table E.1:  
Descriptive comparison

| Sample     | Variable    | Mean   | SD     | Min  | Max    | N         |
|------------|-------------|--------|--------|------|--------|-----------|
| MZ twins   | Birth year  | 1950   | 4.7    | 1943 | 1958   | 2,368     |
|            | Education   | 12.1   | 2.6    | 7    | 19     | 2,368     |
|            | Female      | .57    | .49    | 0    | 1      | 2,368     |
|            | Work income | 248832 | 129638 | 0    | 697910 | 2,309     |
| Population | Birth year  | 1950.2 | 4.6    | 1943 | 1958   | 2,194,904 |
|            | Education   | 11.6   | 2.7    | 7    | 19     | 1,886,525 |
|            | Female      | .49    | .50    | 0    | 1      | 2,194,904 |
|            | Work income | 214228 | 135162 | 0    | 666650 | 1,823,563 |

Furthermore, table E.2 contains a comparison between the self-reported party choice in the 2006 national election, and the actual election outcome that year. As we can see, they align very well, with a minor difference for the moderates (30 vs 26 per cent) and the Sweden democrats (1.3 vs 2.9 per cent).

Table E.2:  
Party percentages, national election 2006

| Party               | MZ sample | Election result |
|---------------------|-----------|-----------------|
| Left party          | 5.03      | 5.85            |
| Social democrats    | 35.20     | 34.99           |
| Green party         | 6.51      | 5.24            |
| Center party        | 7.71      | 7.88            |
| People's party      | 5.87      | 7.54            |
| Christian democrats | 7.94      | 6.59            |
| Moderates           | 30.44     | 26.23           |
| Sweden democrats    | 1.29      | 2.93            |
